# Supplementary material for: Impact of the Apolipoprotein E (epsilon) Genotype on Cardiometabolic Risk Markers and Responsiveness to Acute and Chronic Dietary Fat Manipulation
Source: Nutrients. 2019 Sep 1;11(9):2044. doi: 10.3390/nu11092044 (PMC6770634; doi:10.3390/nu11092044)
Supplement: Supplementary file 1 [file nutrients-11-02044-s001.pdf]

Table S1 Habitual dietary intakes for the study group as a whole and according to *APOE* genotype

|                               | All<br>(n=214) | <i>E2</i> carriers<br>(n=30) | <i>E3/E3</i><br>(n=127)  | <i>E4</i> carriers<br>(n=57) | <i>P</i> (genotype) <sup>1</sup> |
|-------------------------------|----------------|------------------------------|--------------------------|------------------------------|----------------------------------|
| <b>Genotype Frequency (%)</b> | -              | 14                           | 59                       | 27                           |                                  |
| Energy, MJ/d                  | 8.6 ± 0.2      | 8.6 ± 0.4                    | 8.3 ± 0.2                | 9.3 ± 0.4                    | 0.410                            |
| Total fat, %TE                | 33.3 ± 0.4     | 34.5 ± 1.5                   | 32.9 ± 0.5               | 33.6 ± 0.8                   | 0.706                            |
| SFA, %TE                      | 11.9 ± 0.2     | 12.6 ± 0.8                   | 11.7 ± 0.2               | 12.0 ± 0.4                   | 0.870                            |
| MUFA, %TE                     | 11.8 ± 0.2     | 11.9 ± 0.5                   | 11.8 ± 0.2               | 11.8 ± 0.3                   | 0.969                            |
| n-6 PUFA, %TE                 | 5.25 ± 0.12    | 5.39 ± 0.35                  | 5.18 ± 0.15              | 5.33 ± 0.25                  | 0.851                            |
| n-3 PUFA, %TE                 | 0.87 ± 0.03    | 0.93 ± 0.12                  | 0.85 ± 0.03              | 0.87 ± 0.06                  | 0.752                            |
| Trans fatty acids, %TE        | 0.95 ± 0.03    | 1.10 ± 0.08 <sup>a</sup>     | 0.89 ± 0.03 <sup>b</sup> | 0.99 ± 0.05 <sup>ab</sup>    | 0.031 <sup>2</sup>               |
| Dietary cholesterol, mg/d     | 265 ± 9        | 290 ± 29                     | 250 ± 11                 | 285 ± 18                     | 0.322                            |
| Protein, %TE                  | 16.1 ± 0.2     | 16.3 ± 0.7                   | 16.1 ± 0.3               | 16.0 ± 0.4                   | 0.987                            |
| Carbohydrate, %TE             | 49.5 ± 0.5     | 48.8 ± 1.7                   | 49.6 ± 0.6               | 49.5 ± 1.0                   | 0.969                            |
| Dietary fibre (AOAC), g/d     | 22.4 ± 0.5     | 21.5 ± 1.5                   | 22.1 ± 0.6               | 23.6 ± 1.1                   | 0.410                            |

Values represent mean ± SEM. Determined from a single 4-day weighed food and drink diary completed prior to the first study visit of the Dietary Intervention and Vascular Function (DIVAS) and DIVAS-2 studies; dietary assessments not available for n=2. *E2* carriers = *E2/E2* and *E2/E3*; *E4* carriers = *E3/E4* and *E4/E4*. *E2/E4* individuals were excluded from the analysis.

<sup>1</sup> Data analysed by univariate general linear model (ANCOVA) adjusted for age, BMI, and gender.

<sup>2</sup> Post-hoc analysis identified differences between genotype groups (identified by different superscript letters <sup>a,b,c</sup> within a row), although these were not significant following Bonferroni correction ( $P \geq 0.017$ ).

Abbreviations: %TE, percentage of total energy; AOAC, Association of Official Analytical Chemists; MUFA, monounsaturated fatty acids; PUFA, polyunsaturated fatty acids; SFA, saturated fatty acids.
